# Supplementary material for: Can the E1state in nitrogenase tell if there is an activation process prior to catalysis?
Source: Royal Society of Chemistry journal article supplement (doi:10.1039/d2cp05642a), 2023-01-01
Supplement: d2cp05642a1.pdf [file d2cp05642a1.pdf]

## Supporting information:

### Can the $E_1$ state in nitrogenase tell if there is an activation process prior to catalysis ?

Per E. M. Siegbahn\*

Department of Organic Chemistry, Arrhenius Laboratory, Stockholm University, SE-106 91, Stockholm, Sweden

Best  $E_1$  state for Mo-nitrogenase with spin-coupling (2-, 4-, 7-) . # denotes frozen atoms

|     |                |                |                |
|-----|----------------|----------------|----------------|
| Mo1 | 16.0171935373  | -6.0245480904  | 53.3721428915  |
| Fe2 | 8.2353899341   | -7.2618615784  | 54.8375387089  |
| Fe3 | 10.7138668236  | -5.7214004356  | 55.3154729009  |
| Fe4 | 10.3958121841  | -6.6549922306  | 52.7242853853  |
| Fe5 | 11.0738103689  | -8.2942626694  | 54.8154650215  |
| Fe6 | 13.7064428047  | -7.8895590899  | 54.2524460523  |
| Fe7 | 13.4908137351  | -5.3888237776  | 54.9885660999  |
| Fe8 | 12.9199229823  | -6.0588734786  | 52.2526139766  |
| C9  | 17.7247667526  | -2.4141365354  | 54.3026180608  |
| H10 | 18.0435154620  | -1.4844377305  | 53.8273944311  |
| H11 | 16.6306532754  | -2.3815302013  | 54.3896384378  |
| C12 | 18.1064326467  | -3.6300904202  | 53.4337109903  |
| C13 | 19.6371658254  | -3.6540288223  | 53.1629645418  |
| H14 | 20.1473444845  | -3.8216581994  | 54.1147955639  |
| H15 | 19.9319210038  | -2.6667942034  | 52.7970527769  |
| C16 | 20.0233991819  | -4.7283546687  | 52.1457805668  |
| H17 | 19.6573940269  | -4.4573701645  | 51.1494369471  |
| H18 | 19.5238772323  | -5.6615168589  | 52.3953219669  |
| C19 | 17.3938066970  | -3.6965082058  | 52.0559134815  |
| O20 | 16.8673736129  | -4.8581969033  | 51.7770958545  |
| O21 | 17.4607812721  | -2.7372705000  | 51.2903271305  |
| O22 | 17.7155568450  | -4.8171954507  | 54.1567885515  |
| C23 | 12.0228315070  | -6.6938900374  | 54.0279844763  |
| S24 | 9.7576751949   | -7.4653337349  | 56.6257437167  |
| S25 | 15.3213103545  | -6.7984160857  | 55.6208869900  |
| S26 | 9.0693759510   | -5.0187667372  | 53.8036779760  |
| S27 | 12.1774530436  | -4.3828645482  | 56.7559795884  |
| S28 | 12.7517499338  | -9.7901747838  | 55.1012526556  |
| S29 | 14.2837005668  | -4.2045103523  | 53.2069327702  |
| S30 | 9.4283204250   | -8.7333218278  | 53.1563508379  |
| S31 | 14.7005876143  | -7.6656048949  | 52.1170050801  |
| S32 | 11.2675726400  | -6.1999399161  | 50.6280816097  |
| H33 | 13.6351749525# | -2.1902100277# | 49.0425569888# |
| C34 | 13.2979259838# | -2.0241169981# | 50.0550230832# |
| H35 | 13.8501701127  | -2.6922824294  | 50.7207491897  |
| H36 | 13.4614809377  | -0.9821135599  | 50.3492431356  |
| N37 | 11.8630237726  | -2.3623490262  | 50.0416372176  |
| H38 | 11.3671520556  | -2.1947580353  | 49.1779484310  |
| C39 | 11.0987917434  | -2.8773749155  | 51.0157812754  |
| N40 | 11.4974436632  | -2.9786454139  | 52.2711476909  |
| H41 | 10.9460269169  | -3.5796251234  | 52.8903739253  |
| H42 | 12.4788884571  | -2.8797690296  | 52.5324476389  |
| N43 | 9.8074742753   | -3.2104082548  | 50.6911402186  |
| H44 | 9.7759157220   | -3.8424582153  | 49.8932445510  |
| H45 | 9.3192600097   | -3.6602345616  | 51.4696705558  |
| H46 | 7.9324790196   | 0.3930527763   | 59.4132657917  |
| C47 | 8.3300917617   | -1.3611972425  | 60.6866310240  |
| H48 | 8.1017033398   | -1.5893028880  | 61.7340061917  |
| H49 | 7.6079300047   | -1.9197449229  | 60.0798717134  |
| C50 | 9.7175817612   | -1.8557838552  | 60.4182164846  |
| N51 | 10.7063057995  | -1.7293757731  | 61.3731551624  |
| C52 | 10.2254178822  | -2.4674746712  | 59.2984157981  |

|      |                |                 |                |
|------|----------------|-----------------|----------------|
| H53  | 9.7830879823   | -2.7668486634   | 58.3645987968  |
| C54  | 11.7874333109  | -2.2561882957   | 60.8298093077  |
| H55  | 12.7548830407  | -2.3486561153   | 61.2977783505  |
| N56  | 11.5514371880  | -2.7113436551   | 59.5753165692  |
| H57  | 19.1123864475  | -4.4013506749   | 57.5367008976  |
| H58  | 16.6917106859  | -8.9227074401   | 50.7245526538  |
| C59  | 18.3072439214  | -7.4857207768   | 50.8287185232  |
| H60  | 17.7055629384  | -6.5755971950   | 50.7796028086  |
| H61  | 19.2502696818  | -7.2807257047   | 50.3058184368  |
| C62  | 18.6260795027  | -7.7799457363   | 52.2693595779  |
| N63  | 17.7535042776  | -7.4907947601   | 53.3153405892  |
| C64  | 19.7705703266  | -8.3198278121   | 52.8045120910  |
| H65  | 20.6965648905  | -8.6189050710   | 52.3395623897  |
| C66  | 18.3609089879  | -7.8390754334   | 54.4385555544  |
| H67  | 17.9698305128  | -7.7005597150   | 55.4339959682  |
| N68  | 19.5800174121  | -8.3560119121   | 54.1747461061  |
| H69  | 20.2652738440  | -8.5627133074   | 54.8871073704  |
| H70  | 6.3928520262#  | -9.4883349472#  | 56.5258899215# |
| C71  | 5.9306891983   | -9.3480020240   | 55.5427568181  |
| H72  | 6.4526415981   | -9.9762969619   | 54.8179943195  |
| H73  | 4.8883486050   | -9.6725752336   | 55.5980433452  |
| S74  | 5.9545057144   | -7.5723644277   | 55.0180351934  |
| H75  | 12.2028507100  | -3.1600045014   | 58.9440653846  |
| H76  | 17.9014609558  | -4.5884201676   | 55.1413660599  |
| C78  | 18.3027107802  | -2.4800718519   | 55.7411270628  |
| O79  | 18.3833029770  | -3.6671441401   | 56.2555170370  |
| O80  | 18.6128348524  | -1.4225194822   | 56.3140352233  |
| C81  | 21.4740427507  | -5.0872833041   | 51.9800073166  |
| O82  | 21.8947645932  | -6.0199569914   | 51.3195198115  |
| O83  | 22.3208179387# | -4.2658019953#  | 52.6398579885# |
| H84  | 15.7024660027# | -0.1996309950#  | 61.4912299974# |
| C85  | 14.8549930045# | -0.0829920069#  | 60.8320010049# |
| H86  | 13.9165020000# | -0.2867340000#  | 61.3260960000# |
| H87  | 14.8254036704  | 0.9912172126    | 60.5834307642  |
| C88  | 15.0599869994# | -0.8751939982#  | 59.5441969910# |
| H89  | 14.3689778807  | -0.5133672798   | 58.7720198241  |
| H90  | 14.8163060126  | -1.9313884121   | 59.7120549141  |
| C91  | 16.4978260357  | -0.8014587062   | 59.0164679826  |
| H92  | 16.8858443035  | 0.2256775498    | 59.0954206044  |
| H93  | 16.5444502107  | -1.0469381908   | 57.9491406967  |
| C94  | 17.4608503311  | -1.7379804864   | 59.7609224994  |
| O95  | 17.1633005326  | -2.2956315802   | 60.8242426633  |
| N96  | 18.6756824072  | -1.8819482394   | 59.1653318050  |
| H97  | 19.2234244742  | -2.6637907399   | 59.5067313191  |
| H98  | 18.7640667949  | -1.6791009613   | 58.1594079560  |
| C99  | 10.6519930120# | 0.0100039695#   | 53.3460010093# |
| H100 | 11.1636990020# | 0.9592719988#   | 53.2872699997# |
| H101 | 9.5863320020#  | 0.1850130130#   | 53.3579369917# |
| H102 | 10.9103313608  | -0.5672622655   | 52.4569311514  |
| C103 | 11.0722432977  | -0.7023675643   | 54.6460152801  |
| H104 | 10.7248365877  | -1.7429004927   | 54.5967343396  |
| C105 | 10.3945551156  | -0.0550524896   | 55.8618591641  |
| H106 | 9.3012186270   | -0.1031395850   | 55.7781166888  |
| H107 | 10.6783728190  | 1.0029877288    | 55.9532525177  |
| H108 | 10.6797610220  | -0.5590131864   | 56.7916026691  |
| C109 | 12.5971477817  | -0.7071671955   | 54.8210482887  |
| H110 | 13.1132445419  | -1.1531608512   | 53.9635550089  |
| H111 | 12.8935789662  | -1.2772732051   | 55.7085382373  |
| H112 | 12.9749575140  | 0.3188119552    | 54.9367122284  |
| H113 | 13.4550770923# | -12.2303889584# | 53.1883130880# |
| C114 | 13.9110028580# | -11.6210550534# | 52.4219888816# |
| H115 | 14.7494660498  | -11.0514632680  | 52.8401583520  |
| H116 | 14.2305825506  | -12.2337977998  | 51.5723144833  |
| N117 | 12.7949954451  | -10.7543261555  | 52.0273001514  |
| H118 | 12.2527122538  | -10.4194443651  | 52.8376676163  |
| C119 | 12.6719331323  | -10.0579316912  | 50.9047784537  |
| N120 | 13.6915668341  | -10.0421951024  | 49.9926796070  |
| H121 | 13.5148824087  | -9.4278037997   | 49.2056614987  |
| H122 | 14.5955391014  | -9.8439820470   | 50.4166988610  |
| N123 | 11.5090271917  | -9.4575506504   | 50.6075081916  |
| H124 | 10.7785526322  | -9.5063264815   | 51.3263918473  |
| H125 | 11.5574545850  | -8.4983403879   | 50.2307804188  |
| H126 | 19.2126453700  | -8.2193173922   | 61.7043361057  |
| C127 | 19.5978930076# | -7.2298799967#  | 61.9900510112# |
| H128 | 20.6394523076  | -7.3571523959   | 62.3026662879  |

|      |                |                |                |
|------|----------------|----------------|----------------|
| C129 | 18.8247807121  | -6.7003796722  | 63.1955915826  |
| O130 | 19.3703026549  | -6.2649398481  | 64.2068807633  |
| C131 | 19.4918729811# | -6.2717979766# | 60.7990649847# |
| H132 | 19.8522547399  | -5.2781747029  | 61.0904429416  |
| H133 | 18.4379330023  | -6.1347600013  | 60.5315047467  |
| C134 | 20.2520627026  | -6.7605237192  | 59.5498952403  |
| H135 | 20.0805159087  | -7.8310811707  | 59.3808240409  |
| H136 | 21.3381528799  | -6.6481132486  | 59.6947318252  |
| C137 | 19.8953753254  | -6.0690794830  | 58.2301512991  |
| O138 | 20.0488580431  | -6.6216650934  | 57.1518581845  |
| O139 | 19.4342901287  | -4.8360776570  | 58.3978871695  |
| N140 | 17.4719753714  | -6.7379005450  | 63.0214534345  |
| H141 | 17.1178180210  | -7.0259324024  | 62.1177549443  |
| C142 | 16.5368840064# | -6.0058840151# | 63.8530429850# |
| H143 | 15.8534070909  | -6.7096636868  | 64.3500518968  |
| H144 | 17.1226644262  | -5.5073790786  | 64.6296175741  |
| C145 | 15.7154887280  | -4.9839548157  | 63.0305634016  |
| H146 | 16.3698544024  | -4.1711481206  | 62.6956490740  |
| H147 | 14.9650901760  | -4.5441238808  | 63.7018544291  |
| C148 | 15.0446475373  | -5.6157431751  | 61.8216491221  |
| C149 | 13.9563823542  | -6.4909362390  | 61.9654688700  |
| H150 | 13.5439286934  | -6.6757022669  | 62.9569985510  |
| C151 | 15.5461192514  | -5.3795735440  | 60.5298799458  |
| H152 | 16.3605324044  | -4.6710531206  | 60.4017356104  |
| C153 | 13.3906080839  | -7.1200421097  | 60.8536355420  |
| H154 | 12.5435699236  | -7.7890103136  | 60.9814307852  |
| C155 | 14.9848875525  | -6.0139934706  | 59.4144607170  |
| H156 | 15.3823830294  | -5.8287514353  | 58.4197427099  |
| C157 | 13.9093094240  | -6.8910353995  | 59.5740650330  |
| H158 | 13.4837974568  | -7.3949109782  | 58.7091538265  |
| H159 | 9.0037569561#  | 0.7050730609#  | 60.7752690161# |
| C160 | 8.1269791487#  | 0.1560809904#  | 60.4649998342# |
| H161 | 7.2836720085#  | 0.4592428886#  | 61.0677680679# |
| H269 | 18.2592770520# | -9.4987539583# | 50.1505389810# |
| C270 | 17.5839770007# | -8.6559199791# | 50.1520231667# |
| H271 | 17.2773629644# | -8.4419890150# | 49.1387980076# |
| H273 | 23.2141828700  | -4.6119358102  | 52.4539928778  |
| H274 | 12.2918127391  | -5.4177015807  | 57.6180121957  |

Best H<sup>-</sup> E<sub>1</sub> state for Mo-nitrogenase with spin-coupling (2-, 4-, 6-). \* denotes frozen atoms

|     |                |                |                |
|-----|----------------|----------------|----------------|
| Mo1 | 15.8985629777  | -6.1600694439  | 53.2055854289  |
| Fe2 | 8.2413522121   | -8.0126553338  | 54.2377845329  |
| Fe3 | 10.3014248567  | -6.0223083521  | 55.0293098463  |
| Fe4 | 10.6199227707  | -7.1566391961  | 52.4269460901  |
| Fe5 | 11.1354668634  | -8.7262111290  | 54.6598965881  |
| Fe6 | 13.7553833321  | -8.0853419506  | 54.2612063409  |
| Fe7 | 12.9000842405  | -5.5535404452  | 54.7970970394  |
| Fe8 | 13.1073889995  | -6.3418574719  | 52.0801945838  |
| C9  | 17.5800164527  | -2.5732823939  | 54.1926549982  |
| H10 | 17.8809447168  | -1.6307179758  | 53.7319762511  |
| H11 | 16.4845984985  | -2.5771060497  | 54.2651181802  |
| C12 | 18.0192909877  | -3.7709183851  | 53.3226070444  |
| C13 | 19.5647567550  | -3.7585919712  | 53.1276950042  |
| H14 | 20.0260703396  | -3.9341736180  | 54.1044015492  |
| H15 | 19.8547173522  | -2.7555804645  | 52.7994513837  |
| C16 | 20.0340607198  | -4.8052368741  | 52.1112183903  |
| H17 | 19.7316877415  | -4.5070624039  | 51.0984135120  |
| H18 | 19.5321065976  | -5.7513506168  | 52.3060169887  |
| C19 | 17.3506008582  | -3.8290485380  | 51.9234710396  |
| O20 | 16.7577656984  | -4.9616447922  | 51.6500426731  |
| O21 | 17.4869320212  | -2.8890215416  | 51.1442733457  |
| O22 | 17.6130202343  | -4.9689043774  | 54.0170124285  |
| C23 | 12.0468851225  | -7.0702165408  | 53.8975993010  |
| S24 | 9.5426962114   | -7.9435528679  | 56.2255471618  |
| S25 | 15.0941761877  | -6.6118876932  | 55.4733141612  |
| S26 | 8.8779802372   | -5.7765335175  | 53.2037734263  |
| S27 | 11.4757555367  | -4.1384375327  | 55.7800043244  |
| S28 | 12.9348912279  | -9.9759118684  | 55.2192801972  |
| S29 | 14.1239498035  | -4.4562110709  | 53.0444280111  |
| S30 | 9.8241163116   | -9.3735898289  | 52.8153422724  |
| S31 | 14.7798279881  | -7.9774015422  | 52.0947832243  |
| S32 | 11.5392880606  | -6.6109585799  | 50.3622637228  |
| H33 | 13.6351748707# | -2.1902101419# | 49.0425569802# |

|      |                |                |                |
|------|----------------|----------------|----------------|
| C34  | 13.2979258585# | -2.0241169478# | 50.0550232396# |
| H35  | 13.9409005007  | -2.5834656313  | 50.7401843439  |
| H36  | 13.3102956051  | -0.9558384700  | 50.2967674621  |
| N37  | 11.9267317418  | -2.5678327358  | 50.0494328621  |
| H38  | 11.4760980374  | -2.6428353168  | 49.1487510869  |
| C39  | 11.1921436025  | -3.0930291280  | 51.0428186929  |
| N40  | 11.5106726128  | -2.9405102817  | 52.3183351387  |
| H41  | 11.1028426302  | -3.5523208989  | 53.0263314914  |
| H42  | 12.4185683336  | -2.5747249290  | 52.5819333070  |
| N43  | 10.0309786390  | -3.7203916014  | 50.6853066367  |
| H44  | 10.2208963350  | -4.5144688270  | 50.0620614406  |
| H45  | 9.5117976621   | -4.0903216172  | 51.4864988010  |
| H46  | 7.9265541308   | 0.3931756053   | 59.4143079833  |
| C47  | 8.2974361966   | -1.3619548247  | 60.6826153390  |
| H48  | 8.3130395829   | -1.5524866701  | 61.7640375779  |
| H49  | 7.4101648260   | -1.8755428253  | 60.2886973616  |
| C50  | 9.5292946027   | -1.9741904358  | 60.0921590892  |
| N51  | 10.7370279131  | -1.9417382772  | 60.7652402718  |
| C52  | 9.6701590355   | -2.6547426265  | 58.9038961145  |
| H53  | 8.9777759344   | -2.9034545810  | 58.1135309669  |
| C54  | 11.5822921753  | -2.5973842604  | 59.9906390681  |
| H55  | 12.6243549517  | -2.7854833572  | 60.2088464191  |
| N56  | 10.9878750785  | -3.0483072998  | 58.8543853824  |
| H57  | 18.9462533326  | -4.5324701512  | 57.4564938257  |
| H58  | 16.6960919780  | -8.9196425413  | 50.7250358603  |
| C59  | 18.3451584819  | -7.5202819718  | 50.8453236370  |
| H60  | 17.7871240922  | -6.5841913015  | 50.7842769221  |
| H61  | 19.3092604523  | -7.3597190742  | 50.3464581710  |
| C62  | 18.6125782665  | -7.8329691746  | 52.2946235337  |
| N63  | 17.6759244684  | -7.5933331267  | 53.2942229305  |
| C64  | 19.7470452961  | -8.3342703751  | 52.8876169224  |
| H65  | 20.7093846112  | -8.5873869249  | 52.4717599210  |
| C66  | 18.2307887291  | -7.9299995179  | 54.4454646220  |
| H67  | 17.7812530210  | -7.8124182735  | 55.4194943280  |
| N68  | 19.4826619279  | -8.3963303651  | 54.2456746995  |
| H69  | 20.1412995834  | -8.5572779094  | 54.9953542528  |
| H70  | 6.3928521306#  | -9.4883347801# | 56.5258897734# |
| C71  | 6.0446846059   | -9.8759956476  | 55.5626578168  |
| H72  | 6.6996129252   | -10.6975002542 | 55.2563542829  |
| H73  | 5.0301240841   | -10.2700698368 | 55.6863297307  |
| S74  | 5.9968809900   | -8.5385305028  | 54.2793143862  |
| H75  | 11.4108544777  | -3.5604336012  | 58.0796682349  |
| H76  | 17.7528440865  | -4.7392126055  | 55.0126614162  |
| C78  | 18.1468877114  | -2.6434982386  | 55.6352539421  |
| O79  | 18.2077710979  | -3.8332075218  | 56.1484495330  |
| O80  | 18.4779105997  | -1.5900088646  | 56.2019298208  |
| C81  | 21.4981734134  | -5.1524124019  | 52.0299537940  |
| O82  | 21.9481430453  | -6.1314597290  | 51.4600307873  |
| O83  | 22.3208179414# | -4.2658020014# | 52.6398579915# |
| H84  | 15.7024660029# | -0.1996309947# | 61.4912299972# |
| C85  | 14.8549930092# | -0.0829920021# | 60.8320010027# |
| H86  | 13.9165020000# | -0.2867340000# | 61.3260960000# |
| H87  | 14.8255694509  | 0.9913001267   | 60.5821405609  |
| C88  | 15.0599869952# | -0.8751940043# | 59.5441969846# |
| H89  | 14.3544032818  | -0.5287271591  | 58.7786949940  |
| H90  | 14.8350517409  | -1.9338988737  | 59.7179818766  |
| C91  | 16.4915897791  | -0.7794023929  | 58.9981223722  |
| H92  | 16.8675092658  | 0.2514740065   | 59.0865009570  |
| H93  | 16.5265439347  | -1.0122181685  | 57.9277687966  |
| C94  | 17.4744201257  | -1.7091571521  | 59.7233024745  |
| O95  | 17.2361156877  | -2.1969433627  | 60.8330056018  |
| N96  | 18.6408253695  | -1.9292157164  | 59.0582190472  |
| H97  | 19.1919693986  | -2.7020182872  | 59.4130488781  |
| H98  | 18.6798072091  | -1.7799572078  | 58.0401366748  |
| C99  | 10.6519930332# | 0.0100038852#  | 53.3460009832# |
| H100 | 11.1636989625# | 0.9592720192#  | 53.2872699834# |
| H101 | 9.5863320017#  | 0.1850130095#  | 53.3579370086# |
| H102 | 10.9094409980  | -0.5776427698  | 52.4639624809  |
| C103 | 11.0813406884  | -0.6638980433  | 54.6618297098  |
| H104 | 10.7538769274  | -1.7093536463  | 54.6551603734  |
| C105 | 10.4080225787  | 0.0128458669   | 55.8640650695  |
| H106 | 9.3147745551   | -0.0313260028  | 55.7784500557  |
| H107 | 10.6958381974  | 1.0715945752   | 55.9378952393  |
| H108 | 10.6867394661  | -0.4800750090  | 56.8015494901  |
| C109 | 12.6071986656  | -0.6437311852  | 54.8258110901  |

|      |                |                 |                |
|------|----------------|-----------------|----------------|
| H110 | 13.1276563832  | -1.0838442053   | 53.9655385509  |
| H111 | 12.9183723085  | -1.2084837928   | 55.7102001923  |
| H112 | 12.9690447432  | 0.3895424826    | 54.9280764510  |
| H113 | 13.4550770972# | -12.2303889389# | 53.1883131066# |
| C114 | 13.9110028472# | -11.6210550770# | 52.4219888505# |
| H115 | 14.6090595423  | -10.9196873359  | 52.8847853544  |
| H116 | 14.4163558094  | -12.2478672606  | 51.6801058254  |
| N117 | 12.7880876666  | -10.9244491831  | 51.7889133002  |
| H118 | 12.0076066880  | -10.6782974540  | 52.4035412551  |
| C119 | 12.7955058612  | -10.3345096375  | 50.6019478879  |
| N120 | 13.9442323359  | -10.2841793476  | 49.8708069154  |
| H121 | 13.8573177960  | -9.7485315561   | 49.0147907797  |
| H122 | 14.7651903961  | -10.0139273977  | 50.4063375160  |
| N123 | 11.6554655690  | -9.8601428977   | 50.0568474199  |
| H124 | 10.8451805295  | -9.9199879819   | 50.6798739339  |
| H125 | 11.7239727258  | -8.8918499541   | 49.7061417441  |
| H126 | 19.1944405447  | -8.2138903628   | 61.7109193902  |
| C127 | 19.5978929948# | -7.2298799970#  | 61.9900510110# |
| H128 | 20.6400335903  | -7.3713126041   | 62.2940446577  |
| C129 | 18.8369723013  | -6.6821775555   | 63.1970414594  |
| O130 | 19.3919910999  | -6.1977567228   | 64.1803739302  |
| C131 | 19.4918729947# | -6.2717979790#  | 60.7990649904# |
| H132 | 19.9266293984  | -5.3008392700   | 61.0614069370  |
| H133 | 18.4369161018  | -6.0736420652   | 60.5832830458  |
| C134 | 20.1532782716  | -6.8230654799   | 59.5193763273  |
| H135 | 19.9364565615  | -7.8917195002   | 59.4032670818  |
| H136 | 21.2482551187  | -6.7486219103   | 59.5905522089  |
| C137 | 19.7432206145  | -6.1771743024   | 58.1903071014  |
| O138 | 19.8534364972  | -6.7745884434   | 57.1275220826  |
| O139 | 19.2906953174  | -4.9362956156   | 58.3249461714  |
| N140 | 17.4818625693  | -6.7648667033   | 63.0528281329  |
| H141 | 17.1233709724  | -7.0915190008   | 62.1638945712  |
| C142 | 16.5368840094# | -6.0058840138#  | 63.8530429874# |
| H143 | 15.8494725611  | -6.6977838125   | 64.3606643095  |
| H144 | 17.1135470121  | -5.4858194610   | 64.6216843088  |
| C145 | 15.7270065165  | -5.0131968583   | 62.9862698326  |
| H146 | 16.3737339130  | -4.1867704219   | 62.6720204793  |
| H147 | 14.9360650585  | -4.5832017144   | 63.6163020850  |
| C148 | 15.1251574420  | -5.6688192419   | 61.7539963254  |
| C149 | 14.0911411682  | -6.6142139339   | 61.8586118835  |
| H150 | 13.6809652587  | -6.8556741541   | 62.8381142259  |
| C151 | 15.6236779012  | -5.3627765577   | 60.4771757274  |
| H152 | 16.3982051751  | -4.6059051118   | 60.3805278370  |
| C153 | 13.5685575457  | -7.2341858444   | 60.7211478022  |
| H154 | 12.7594168763  | -7.9535350411   | 60.8185152680  |
| C155 | 15.1022195513  | -5.9837917653   | 59.3362592409  |
| H156 | 15.4891560844  | -5.7330883002   | 58.3525713404  |
| C157 | 14.0739810730  | -6.9228850084   | 59.4545044442  |
| H158 | 13.6674642720  | -7.3988728741   | 58.5667716744  |
| H159 | 9.0037569399#  | 0.7050730470#   | 60.7752690866# |
| C160 | 8.1269792709#  | 0.1560810487#   | 60.4649996347# |
| H161 | 7.2836720149#  | 0.4592427893#   | 61.0677681268# |
| H269 | 18.2592770429# | -9.4987539657#  | 50.1505389506# |
| C270 | 17.5839770153# | -8.6559199397#  | 50.1520233041# |
| H271 | 17.2773629666# | -8.4419890163#  | 49.1387980066# |
| H273 | 23.2219852597  | -4.6153691668   | 52.5054599738  |
| H274 | 12.4326316646  | -6.6194883238   | 55.8075893016  |

### Best A<sub>2</sub> state for V-nitrogenase with spin-coupling (2-, 4-, 5-).

|    |                |               |              |
|----|----------------|---------------|--------------|
| V  | 99.5463159391  | 62.3314898241 | 7.2185815755 |
| Fe | 105.2671594896 | 59.7647815601 | 2.2139160720 |
| Fe | 102.8278352367 | 61.3946375213 | 2.8125921171 |
| Fe | 105.0991269246 | 61.0449860189 | 5.0580012232 |
| Fe | 102.8511259488 | 59.0756101167 | 3.8466392742 |
| Fe | 100.3450949423 | 59.8649905040 | 5.4672166581 |
| Fe | 100.5523703709 | 62.2794691685 | 4.1899877771 |
| Fe | 102.4145140098 | 61.6740154325 | 6.0586573658 |
| C  | 101.8283120831 | 60.7265021269 | 4.4337325865 |
| S  | 105.0367007319 | 58.7315596189 | 4.5748748550 |
| S  | 104.5390182664 | 61.8344703134 | 7.1409311618 |
| S  | 105.0346096787 | 62.1487749755 | 3.0075335951 |
| S  | 102.9950851273 | 59.4232384531 | 1.5074221604 |
| S  | 101.2446703846 | 63.1638545184 | 2.0608940370 |
| S  | 98.5197432413  | 61.4827902395 | 5.1865384995 |

|   |                |               |               |
|---|----------------|---------------|---------------|
| S | 101.0355026920 | 60.5600472235 | 7.6644125958  |
| C | 100.5385924029 | 57.1834090492 | 4.4943105874  |
| O | 101.7869014409 | 57.3576709627 | 4.3818968898  |
| O | 99.7135136551  | 57.9340822076 | 5.0944731120  |
| O | 100.0092145351 | 56.0654948489 | 3.9562622250  |
| C | 97.7776438109  | 66.3238253723 | 5.5326090930  |
| C | 98.7504717063  | 66.2645692152 | 6.7425744062  |
| C | 98.4185489469  | 65.1725284960 | 7.8012519789  |
| C | 97.2001426828  | 65.6097052299 | 8.6457422101  |
| C | 96.7615786095  | 64.5532458318 | 9.6947385245  |
| C | 95.2679301680  | 64.4454875840 | 9.8432462521  |
| C | 99.6246683185  | 64.8651985042 | 8.7210165322  |
| O | 97.2748285573  | 65.1707372513 | 5.1819961368  |
| O | 97.5842889503  | 67.3879264195 | 4.9437342161  |
| O | 94.6808878247  | 63.9787462532 | 8.6806171398  |
| O | 94.5882422560  | 64.7040329291 | 10.8078410508 |
| O | 99.9973142431  | 63.6177883197 | 8.7272947424  |
| O | 100.1537594358 | 65.7574119346 | 9.3891107351  |
| O | 98.1055529514  | 63.9373388741 | 7.1255599105  |
| H | 97.8499093642  | 64.2766010820 | 6.1672208901  |
| H | 99.7400574485  | 66.0487400777 | 6.3222574664  |
| H | 98.7996525325  | 67.2461773413 | 7.2183253685  |
| H | 97.4464102338  | 66.5488751587 | 9.1494788241  |
| H | 96.3808162056  | 65.8196761033 | 7.9488052039  |
| H | 97.1280026489  | 63.5701201567 | 9.3829479387  |
| H | 97.1796605587  | 64.7768810998 | 10.6780628687 |
| C | 106.6482281454 | 57.1295661929 | 1.2834356929  |
| H | 105.8336506337 | 56.8872677493 | 0.5947588460  |
| H | 106.3423076087 | 56.8798909039 | 2.3035657292  |
| S | 107.1067235443 | 58.9182011483 | 1.1551332359  |
| C | 93.8170899606  | 61.0269089666 | 1.8605913139  |
| C | 93.6139174978  | 61.1769433574 | 3.3666946095  |
| C | 94.6216104296  | 62.2043536112 | 3.8921787213  |
| C | 94.4621942945  | 62.5271321916 | 5.3698632518  |
| N | 95.6877538402  | 63.2067362146 | 5.8763720156  |
| C | 93.0790262844  | 59.8959601323 | 1.1410744300  |
| H | 94.8896685561  | 60.9033646170 | 1.6676319820  |
| H | 93.5459019241  | 61.9795631204 | 1.3838761824  |
| H | 93.7734543679  | 60.2145807919 | 3.8754694257  |
| H | 92.5813633360  | 61.4856029339 | 3.5905410349  |
| H | 95.6324151609  | 61.8114873569 | 3.7247505904  |
| H | 94.5531490721  | 63.1312920077 | 3.3076956093  |
| H | 94.3351655538  | 61.6147362056 | 5.9633425601  |
| H | 93.6070953888  | 63.1805435633 | 5.5691114157  |
| H | 95.6393001308  | 63.4046954600 | 6.8840106245  |
| H | 96.5308263713  | 62.6139771066 | 5.7055536164  |
| H | 95.9434273656  | 64.1151841875 | 5.4065054213  |
| H | 91.9890650009  | 59.9610520799 | 1.2454051768  |
| H | 93.4048998609  | 58.9145809163 | 1.4526838819  |
| C | 100.0989993028 | 60.0520006371 | 10.8889971916 |
| C | 99.1977560724  | 61.2906604260 | 10.6858459744 |
| C | 98.0090161633  | 61.0401244972 | 9.8192631444  |
| N | 98.0015916745  | 61.2588238056 | 8.4506943566  |
| C | 96.8077546326  | 60.4843920382 | 10.1871436128 |
| C | 96.8391441429  | 60.8138333855 | 8.0042348574  |
| N | 96.0756172702  | 60.3504658244 | 9.0230230467  |
| H | 100.7720111841 | 59.8784110929 | 10.1700238452 |
| H | 99.4796615403  | 59.1535236998 | 11.0189460268 |
| H | 100.5712427280 | 60.2159537877 | 11.7550861890 |
| H | 98.8328907367  | 61.5997527285 | 11.6746415761 |
| H | 99.7766977857  | 62.1239778541 | 10.2844854433 |
| H | 96.4253459411  | 60.1745368133 | 11.1473482686 |
| H | 95.1769666898  | 59.9007929216 | 8.9277617451  |
| H | 96.5578046812  | 60.7561576474 | 6.9652037229  |
| C | 101.6500025950 | 56.1420052972 | 7.7050018218  |
| N | 102.8165550730 | 56.9752042338 | 7.3911463469  |
| C | 103.3454047090 | 57.9237523809 | 8.1730590535  |
| N | 102.8098339054 | 58.1432984381 | 9.4074763978  |
| N | 104.4481801045 | 58.5770160613 | 7.8050953008  |
| H | 101.7218508293 | 55.2516469973 | 7.0724437718  |
| H | 100.7886343724 | 56.5995588075 | 7.4843449788  |
| H | 101.6262276849 | 55.8261440169 | 8.6535096651  |
| H | 103.0531575969 | 57.0430435614 | 6.4032450481  |
| H | 103.2174580579 | 58.9319503003 | 9.8964046440  |
| H | 101.7965149746 | 58.1682699960 | 9.4313692669  |

|   |                |               |               |
|---|----------------|---------------|---------------|
| H | 104.8024798562 | 58.3914852068 | 6.8575415405  |
| H | 104.5032864078 | 59.5914489905 | 8.0002718724  |
| C | 104.8710010619 | 65.5940002356 | -4.0429952461 |
| C | 104.6046810789 | 64.0835285435 | -3.8381936883 |
| C | 104.2634369233 | 63.6273457325 | -2.4529767799 |
| N | 103.1839996541 | 62.7943088516 | -2.2355443870 |
| C | 104.9500460890 | 63.8233434137 | -1.2743282189 |
| C | 103.2225901899 | 62.4915194850 | -0.9531262089 |
| N | 104.2687829958 | 63.0938679841 | -0.3232256419 |
| H | 105.4142233210 | 65.9758307944 | -3.2952586385 |
| H | 103.9386900531 | 66.1635868477 | -4.1248840144 |
| H | 105.3923871722 | 65.6470938310 | -4.8946699669 |
| H | 105.5021582303 | 63.5419818824 | -4.1766010584 |
| H | 103.7947684989 | 63.7551655136 | -4.4985999580 |
| H | 105.8431827295 | 64.3790223812 | -1.0297864924 |
| H | 104.5286532877 | 62.9728326319 | 0.6513174377  |
| H | 102.5299244372 | 61.8490370345 | -0.4311784555 |
| C | 95.6299757402  | 57.4820326636 | 6.4910616030  |
| C | 97.0398329661  | 57.2952434612 | 7.0675559837  |
| O | 97.7661948711  | 56.3310942774 | 6.3184538142  |
| C | 96.9901805012  | 56.8024437376 | 8.5148465666  |
| H | 95.0594485546  | 58.2205714647 | 7.0754734146  |
| H | 98.0037215793  | 56.7201625432 | 8.9210101176  |
| H | 96.5259996186  | 55.8096606669 | 8.5554310239  |
| H | 96.4169391172  | 57.4809374760 | 9.1574670847  |
| H | 95.0845625942  | 56.5313120315 | 6.5453204361  |
| H | 98.2988718870  | 56.8193593650 | 5.6627156252  |
| H | 97.5711243746  | 58.2576783356 | 7.0398048609  |
| C | 98.4859996707  | 66.3580013383 | -1.7130007001 |
| C | 98.8062104818  | 65.6203965910 | -0.3948537491 |
| C | 98.2379509215  | 66.2405035707 | 0.8885096012  |
| C | 96.7491283960  | 65.9945835697 | 1.1372533626  |
| O | 96.0353874397  | 65.3088966119 | 0.4026524743  |
| N | 96.2468785945  | 66.6187375676 | 2.2477272691  |
| H | 98.7144620115  | 67.3289719327 | -1.6420951176 |
| H | 97.4203953663  | 66.2653818237 | -1.9530097264 |
| H | 99.0290071105  | 65.9401255110 | -2.4413702110 |
| H | 98.4660839786  | 64.5820782968 | -0.4640756037 |
| H | 99.8967053092  | 65.5737914832 | -0.2805447336 |
| H | 98.7766251531  | 65.8306650752 | 1.7549883307  |
| H | 98.4180756732  | 67.3249195667 | 0.9161785990  |
| H | 96.8335939093  | 66.9206070845 | 3.0288194773  |
| H | 95.3052431751  | 66.3449369386 | 2.4964348041  |
| C | 103.6859926055 | 68.3259921635 | 12.1929976188 |
| C | 104.4274335777 | 68.6163291339 | 10.8659730655 |
| C | 103.8506935802 | 67.9085635664 | 9.6307858100  |
| C | 103.7580544663 | 66.3767973793 | 9.7204265645  |
| C | 103.2523466271 | 65.8153231553 | 8.3939981372  |
| N | 102.8677252042 | 64.3747925156 | 8.4547330410  |
| H | 104.1085750925 | 67.5601823910 | 12.6777192456 |
| H | 102.6338333119 | 68.0769211509 | 12.0010886835 |
| H | 103.6948494749 | 69.1366815188 | 12.7784182437 |
| H | 104.4064635976 | 69.6951173511 | 10.6641489435 |
| H | 105.4893116609 | 68.3548444657 | 10.9769041399 |
| H | 102.8403692485 | 68.2976665822 | 9.4411540084  |
| H | 104.4548366376 | 68.1811023823 | 8.7535842211  |
| H | 104.7356479620 | 65.9419795676 | 9.9726345874  |
| H | 103.0557211155 | 66.0967123221 | 10.5158929248 |
| H | 102.3486963942 | 66.3427345926 | 8.0820393639  |
| H | 103.9994979889 | 65.9049840162 | 7.6005023638  |
| H | 103.6591512066 | 63.7129880094 | 8.5265043989  |
| H | 102.1512375792 | 64.1972701870 | 9.1711457793  |
| H | 102.3925068055 | 64.1077144914 | 7.5447244774  |
| H | 93.7213155930  | 63.9804262761 | 8.8589643193  |
| H | 95.6198511387  | 57.7972834465 | 5.4686067806  |
| H | 93.3471300583  | 60.0483401522 | 0.1060380432  |
| H | 107.5224145779 | 56.5249257940 | 1.0242612116  |
| H | 100.7327212094 | 55.6133071215 | 3.4873711257  |
| S | 101.2250197713 | 63.7461977479 | 5.9049971393  |
| H | 102.0197844611 | 64.1152716487 | 2.6304945974  |
| H | 94.8291930935  | 59.8672867016 | -1.0815080617 |
| C | 95.2420429599  | 60.2379262897 | -2.0081038470 |
| H | 95.8060990000  | 59.4731290000 | -2.5212650000 |
| C | 96.1753965801  | 61.4353101561 | -1.7394216349 |
| C | 97.1819602594  | 61.1075821703 | -0.6569409322 |

|   |               |               |               |
|---|---------------|---------------|---------------|
| C | 98.0738672904 | 60.0313509602 | -0.7918158831 |
| C | 97.1925461474 | 61.8402682587 | 0.5362783086  |
| C | 98.9346783303 | 59.6777737267 | 0.2482045383  |
| C | 98.0411439057 | 61.4789310236 | 1.5845890160  |
| C | 98.9063832762 | 60.3906600423 | 1.4501408014  |
| H | 94.4107635054 | 60.5263834352 | -2.6653814129 |
| H | 96.6848684491 | 61.7095203660 | -2.6737124984 |
| H | 95.5966094247 | 62.3148488362 | -1.4354086429 |
| H | 96.5509226748 | 62.7134295452 | 0.6321411735  |
| H | 98.1011030095 | 59.4665502308 | -1.7215045260 |
| H | 98.0402407513 | 62.0575091898 | 2.5018065058  |
| H | 99.5766198548 | 60.1192491039 | 2.2603993247  |
| H | 99.6362776329 | 58.8577925898 | 0.1220545953  |

Best H<sup>-</sup> A<sub>2</sub> state for V-nitrogenase with spin-coupling (2-, 3-, 5-). \* denotes frozen atoms

|     |                |                |               |
|-----|----------------|----------------|---------------|
| V1  | 99.6529231078  | 62.4292255985  | 7.2109542281  |
| Fe2 | 105.3854668445 | 59.9214066903  | 2.3458387983  |
| Fe3 | 102.9921610056 | 61.6919612456  | 2.8950545529  |
| Fe4 | 105.2667120144 | 61.2207308687  | 5.0440787800  |
| Fe5 | 103.0271613134 | 59.1575329604  | 3.8792382337  |
| Fe6 | 100.5525569890 | 59.9087825306  | 5.4216484688  |
| Fe7 | 100.7549981367 | 62.3550169234  | 4.2061013652  |
| Fe8 | 102.5585115828 | 61.8897644755  | 6.1624731278  |
| C9  | 102.1519474589 | 60.9497707272  | 4.4519870909  |
| S10 | 105.2907870129 | 58.9276416210  | 4.5812624483  |
| S11 | 104.6733762824 | 62.0414614214  | 7.0795855284  |
| S12 | 105.3382410925 | 62.2479593905  | 2.9412412474  |
| S13 | 103.0937440481 | 59.6750842232  | 1.6190776283  |
| S15 | 101.5755143600 | 63.5785032791  | 2.2773030176  |
| S16 | 98.7249037690  | 61.6230605173  | 5.1413797167  |
| S17 | 101.2093768158 | 60.7049336843  | 7.6664998088  |
| C18 | 100.7813963313 | 57.2572978897  | 4.8276304502  |
| O19 | 102.0211274106 | 57.7922590821  | 4.7342606761  |
| O20 | 99.8572180239  | 58.1195582895  | 5.2389059342  |
| O21 | 100.5666350625 | 56.0720933595  | 4.6325646800  |
| C22 | 97.8311894908  | 66.4192739892  | 5.6242292256  |
| C23 | 98.7908009141  | 66.3469211230  | 6.8446583238  |
| C24 | 98.4595503393  | 65.2248535572  | 7.8737310560  |
| C25 | 97.2244521681  | 65.6298375897  | 8.7101984433  |
| C26 | 96.7665830474  | 64.5455848929  | 9.7218088699  |
| C27 | 95.2679301335# | 64.4454875833# | 9.8432462654# |
| C28 | 99.6636193629  | 64.9158466906  | 8.7924501434  |
| O29 | 97.3347467946  | 65.2668404147  | 5.2606805092  |
| O30 | 97.6402466776  | 67.4862885944  | 5.0432639347  |
| O31 | 94.7022512957  | 64.0073827577  | 8.6601920678  |
| O32 | 94.5748512690  | 64.6918266962  | 10.8011193309 |
| O33 | 100.0706008300 | 63.6787524372  | 8.7552971492  |
| O34 | 100.1777892951 | 65.7949976059  | 9.4888967859  |
| O35 | 98.1754741165  | 64.0015487759  | 7.1650974878  |
| H36 | 97.9016266908  | 64.3723029441  | 6.2140658506  |
| H37 | 99.7886293757  | 66.1575592067  | 6.4313868005  |
| H38 | 98.8192463675  | 67.3177735493  | 7.3436319763  |
| H39 | 97.4561718750  | 66.5571184647  | 9.2422624223  |
| H40 | 96.4179132472  | 65.8543380972  | 8.0031454148  |
| H41 | 97.1319519389  | 63.5691509227  | 9.3878580273  |
| H42 | 97.1704463950  | 64.7390268664  | 10.7175066435 |
| C43 | 106.6793943638 | 57.1011521039  | 1.4224994676  |
| H44 | 105.7598556300 | 56.7610164948  | 0.9380028475  |
| H45 | 106.6060572555 | 56.9255316928  | 2.4988695106  |
| S46 | 106.9718092089 | 58.8916823184  | 1.0719863286  |
| C47 | 93.8560390090  | 61.0178620823  | 1.8409979455  |
| C48 | 93.6940051024  | 61.1782748243  | 3.3509498549  |
| C49 | 94.7324811554  | 62.1874143610  | 3.8547804215  |
| C50 | 94.5753705073  | 62.5326900777  | 5.3276409546  |
| N51 | 95.7908847956  | 63.2377937071  | 5.8274206277  |
| C52 | 93.0790262951# | 59.8959601485# | 1.1410744386# |
| H53 | 94.9220511456  | 60.8699110700  | 1.6220484617  |
| H54 | 93.5939993769  | 61.9741210749  | 1.3667457761  |
| H55 | 93.8427437899  | 60.2146898095  | 3.8601845307  |
| H56 | 92.6736992898  | 61.5109723631  | 3.5954301586  |



|      |                 |                |                |
|------|-----------------|----------------|----------------|
| H57  | 95.7338659790   | 61.7675296590  | 3.6928152500   |
| H58  | 94.6862587992   | 63.1064080864  | 3.2553989955   |
| H59  | 94.4600265352   | 61.6290181925  | 5.9360062800   |
| H60  | 93.7133241823   | 63.1794592341  | 5.5177275512   |
| H61  | 95.7499176575   | 63.4187775929  | 6.8387052444   |
| H62  | 96.6489572007   | 62.6752096332  | 5.6398139365   |
| H63  | 96.0118051030   | 64.1616010083  | 5.3758636413   |
| H64  | 91.9927371627   | 59.9795820391  | 1.2599237006   |
| H65  | 93.4048998636#  | 58.9145809179# | 1.4526838844#  |
| C66  | 100.0989992610# | 60.0520006530# | 10.8889971563# |
| C67  | 99.2057601750   | 61.2926311801  | 10.6640732235  |
| C68  | 98.0656489873   | 61.0404260976  | 9.7346364352   |
| N69  | 98.1198788555   | 61.2807613950  | 8.3697841053   |
| C70  | 96.8671826177   | 60.4390199706  | 10.0320647493  |
| C71  | 96.9977217399   | 60.8000956046  | 7.8589123823   |
| N72  | 96.1997076070   | 60.3002859294  | 8.8313532064   |
| H73  | 100.7720112696# | 59.8784110559# | 10.1700238713# |
| H74  | 99.4745246498   | 59.1573942921  | 11.0172627292  |
| H75  | 100.5712427270# | 60.2159537750# | 11.7550861919# |
| H76  | 98.7931085917   | 61.5892555413  | 11.6376369391  |
| H77  | 99.8014625712   | 62.1313486299  | 10.2995993118  |
| H78  | 96.4505451628   | 60.0961089967  | 10.9663785762  |
| H79  | 95.3397788046   | 59.7936124688  | 8.6785379830   |
| H80  | 96.7725823328   | 60.7419672578  | 6.8061697332   |
| C81  | 101.6500026134# | 56.1420054254# | 7.7050017999#  |
| N82  | 102.7981726558  | 56.9907043130  | 7.3742604970   |
| C83  | 103.3313220030  | 57.9166494104  | 8.1640081082   |
| N84  | 102.8728205468  | 58.0710442256  | 9.4389498440   |
| N85  | 104.3969257167  | 58.6267651044  | 7.7673824405   |
| H86  | 101.7101724232  | 55.2646356914  | 7.0568549059   |
| H87  | 100.7886343228# | 56.5995587291# | 7.4843450096#  |
| H88  | 101.6262276732# | 55.8261440211# | 8.6535096662#  |
| H89  | 102.9107957400  | 57.1428172374  | 6.3651700044   |
| H90  | 103.2834015868  | 58.8428306641  | 9.9491902415   |
| H91  | 101.8688025240  | 58.0112565548  | 9.5555632168   |
| H92  | 104.7439041805  | 58.4762238568  | 6.8146935405   |
| H93  | 104.4507402394  | 59.6170354676  | 8.0220350152   |
| C94  | 104.8710010733# | 65.5940002370# | -4.0429952382# |
| C95  | 104.6215927497  | 64.0788208205  | -3.8431559873  |
| C96  | 104.2306870956  | 63.6313339369  | -2.4703394542  |
| N97  | 103.0168513625  | 63.0168347410  | -2.2368478012  |
| C98  | 104.9694179007  | 63.6708585826  | -1.3084552920  |
| C99  | 103.0254179174  | 62.6899181503  | -0.9599543147  |
| N100 | 104.1830036186  | 63.0699841797  | -0.3508828243  |
| H101 | 105.4142233361# | 65.9758308102# | -3.2952586576# |
| H102 | 103.9334971895  | 66.1543973259  | -4.1247471649  |
| H103 | 105.3923871597# | 65.6470938288# | -4.8946699747# |
| H104 | 105.5417942632  | 63.5529313200  | -4.1397533729  |
| H105 | 103.8427924186  | 63.7391424850  | -4.5344663027  |
| H106 | 105.9588323420  | 64.0389976623  | -1.0807406242  |
| H107 | 104.4479416664  | 62.8918974519  | 0.6111126422   |
| H108 | 102.2336696971  | 62.1817561807  | -0.4304760642  |
| C109 | 95.6299757997#  | 57.4820326184# | 6.4910615755#  |
| C110 | 97.0763008672   | 57.2995414102  | 6.9814286335   |
| O111 | 97.7467035928   | 56.3825130269  | 6.1381215639   |
| C112 | 97.1239149907   | 56.7655892913  | 8.4170902787   |
| H113 | 95.0738665230   | 58.2148773048  | 7.0964867740   |
| H114 | 98.1623883363   | 56.6853969858  | 8.7557978330   |
| H115 | 96.6787624940   | 55.7642692203  | 8.4560465899   |
| H116 | 96.5829676205   | 57.4134055291  | 9.1193040986   |
| H117 | 95.0924465187   | 56.5279526516  | 6.5515173778   |
| H118 | 98.4554674209   | 56.8604678540  | 5.6599312138   |
| H119 | 97.5893461119   | 58.2709294268  | 6.9483760082   |
| C120 | 98.4859996782#  | 66.3580013412# | -1.7130006747# |
| C121 | 98.8227891511   | 65.6215852563  | -0.3968115579  |
| C122 | 98.2815674145   | 66.2441134778  | 0.8980377459   |
| C123 | 96.8147713934   | 65.9488454315  | 1.2155970511   |
| O124 | 96.1048445266   | 65.1962398386  | 0.5470738895   |
| N125 | 96.3259198595   | 66.6069477651  | 2.3141994179   |
| H126 | 98.7144620120#  | 67.3289719337# | -1.6420951332# |
| H127 | 97.4195525811   | 66.2623254088  | -1.9486843892  |
| H128 | 99.0290071044#  | 65.9401255098# | -2.4413702148# |
| H129 | 98.4784476846   | 64.5844733058  | -0.4590160577  |
| H130 | 99.9151837036   | 65.5729931989  | -0.3033309271  |
| H131 | 98.8673992305   | 65.8663296951  | 1.7487317565   |

|      |                 |                |                |
|------|-----------------|----------------|----------------|
| H132 | 98.4253097189   | 67.3341522036  | 0.9037369036   |
| H133 | 96.9267794624   | 66.9622249481  | 3.0592406530   |
| H134 | 95.4123606967   | 66.2967660132  | 2.6186194542   |
| C135 | 103.6859927191# | 68.3259922420# | 12.1929976657# |
| C136 | 104.4618288591  | 68.6528180298  | 10.8935466332  |
| C137 | 103.9199061838  | 67.9660838954  | 9.6358532238   |
| C138 | 103.8026191738  | 66.4410371156  | 9.7443331882   |
| C139 | 103.2801155066  | 65.8660576604  | 8.4357903923   |
| N140 | 102.8609257255  | 64.4403843732  | 8.5525711426   |
| H141 | 104.1085750606# | 67.5601823681# | 12.6777192371# |
| H142 | 102.6381566728  | 68.0812482660  | 11.9784229324  |
| H143 | 103.6948494176# | 69.1366815090# | 12.7784182581# |
| H144 | 104.4413715998  | 69.7359536415  | 10.7175034725  |
| H145 | 105.5211714476  | 68.3924099221  | 11.0280989299  |
| H146 | 102.9214560523  | 68.3689270731  | 9.4144939189   |
| H147 | 104.5555835498  | 68.2244129777  | 8.7771519906   |
| H148 | 104.7739539986  | 65.9933376941  | 9.9989770264   |
| H149 | 103.1000097554  | 66.1854413842  | 10.5474492026  |
| H150 | 102.3877607443  | 66.4043796596  | 8.1104137339   |
| H151 | 104.0243065013  | 65.9090404076  | 7.6358548427   |
| H152 | 103.6409262176  | 63.7832209891  | 8.6935533878   |
| H153 | 102.1132665316  | 64.3123215018  | 9.2492975382   |
| H154 | 102.4187934047  | 64.1504871820  | 7.6384780097   |
| H155 | 93.7391510815   | 64.0088296439  | 8.8186507653   |
| H156 | 95.6198510704#  | 57.7972834737# | 5.4686067896#  |
| H157 | 93.3471300892#  | 60.0483401954# | 0.1060380772#  |
| H158 | 107.5224145927# | 56.5249257610# | 1.0242611899#  |
| H159 | 100.6884809312  | 61.2469931073  | 3.1215671414   |
| S170 | 101.3128137747  | 63.8848135894  | 5.9131223890   |
| H171 | 102.3232402257  | 64.4709955014  | 2.9658283618   |
| H176 | 94.8291929383#  | 59.8672866358# | -1.0815081575# |
| C177 | 95.2420430589#  | 60.2379262623# | -2.0081038130# |
| H178 | 95.8060990000#  | 59.4731290000# | -2.5212650000# |
| C179 | 96.1452253847   | 61.4621327542  | -1.7815572561  |
| C180 | 97.3190188356   | 61.1281815668  | -0.8879043316  |
| C181 | 98.2212121245   | 60.1133943926  | -1.2446469967  |
| C182 | 97.5008516999   | 61.7932548513  | 0.3308020009   |
| C183 | 99.2646694526   | 59.7523699293  | -0.3946266716  |
| C184 | 98.5450668442   | 61.4321236717  | 1.1861297108   |
| C185 | 99.4201247380   | 60.4040077833  | 0.8309483101   |
| H186 | 94.3960885542   | 60.5026960025  | -2.6584578122  |
| H187 | 96.5014775500   | 61.8210398959  | -2.7578021759  |
| H188 | 95.5738311135   | 62.2877849339  | -1.3417190735  |
| H189 | 96.8401583465   | 62.6171528369  | 0.5924125593   |
| H190 | 98.1090071197   | 59.6026101948  | -2.1989333351  |
| H191 | 98.6825948367   | 61.9561650510  | 2.1261017124   |
| H192 | 100.2325806138  | 60.1188713520  | 1.4897565186   |
| H193 | 99.9609243352   | 58.9695711804  | -0.6829926639  |
